# Supplementary material
Source: ML conference proceedings conference paper supplement (https://proceedings.mlr.press/v108/galy-fajou20a.html)
Supplement: Supplementary file [file galy-fajou20a-supp.pdf]

## A APPENDIX

### A.1 Proof of theorem 2

Theorem 2 states:

**Theorem.** *The complete conditional distributions of the augmented model presented in Section 3.1 are given by*

$$\begin{aligned} p(\omega_i | f_i, y_i) &= \pi_\varphi(\omega_i | \|h(f_i, y_i)\|_2), \\ p(\mathbf{f} | \mathbf{y}, \boldsymbol{\omega}) &= \mathcal{N}(\mathbf{f} | \boldsymbol{\mu}, \boldsymbol{\Sigma}), \end{aligned}$$

where  $\boldsymbol{\Sigma} = (\text{diag}(2\boldsymbol{\omega} \circ \gamma(\mathbf{y})) + K^{-1})^{-1}$  and  $\boldsymbol{\mu} = \boldsymbol{\Sigma}(g(\mathbf{y}) + \boldsymbol{\omega} \circ \beta(\mathbf{y}) + K^{-1}\boldsymbol{\mu}_0)$ ,  $\circ$  denotes the Hadamard product and the function  $h(\cdot)$  is given by the form of likelihood (see Eq.5).

**Proof:** For the full conditional on  $\mathbf{f}$ :

$$\begin{aligned} p(\mathbf{f} | \mathbf{y}, \boldsymbol{\omega}) &\propto p(\mathbf{y} | \mathbf{f}, \boldsymbol{\omega}) p(\mathbf{f}) \\ &\propto \exp \left[ g(\mathbf{y})^\top \mathbf{f} + (\beta(\mathbf{y}) \circ \boldsymbol{\omega})^\top \mathbf{f} - \mathbf{f}^\top \text{diag}(\gamma(\mathbf{y}) \circ \boldsymbol{\omega}) \mathbf{f} - \frac{1}{2} \mathbf{f}^\top K^{-1} \mathbf{f} \right] \\ &\propto \exp \left[ (g(\mathbf{y}) + \beta(\mathbf{y}) \circ \boldsymbol{\omega})^\top \mathbf{f} - \mathbf{f}^\top \left[ \text{diag}(\gamma(\mathbf{y}) \circ \boldsymbol{\omega}) + \frac{1}{2} K^{-1} \right] \mathbf{f} \right]. \end{aligned}$$

We get immediately a multivariate normal distribution with  $-\frac{1}{2}\boldsymbol{\Sigma}^{-1} = -\text{diag}(\gamma(\mathbf{y}) \circ \boldsymbol{\omega}) + \frac{1}{2}K^{-1}$  and  $\boldsymbol{\Sigma}^{-1}\boldsymbol{\mu} = g(\mathbf{y}) + (\beta(\mathbf{y}) \circ \boldsymbol{\omega})$ . Which corresponds to the result shown in equation (11).

For the augmented variable  $\omega_i$ :

$$\begin{aligned} p(\omega_i | y_i, f_i) &\propto p(y_i | f_i, \omega_i) p(\omega_i) \\ &\propto \exp(-\|h(y_i, f_i)\|_2^2 \omega_i) \pi_\varphi(\omega_i | 0) \\ &= \pi_\varphi(\omega_i | \|h(y_i, f_i)\|_2). \end{aligned}$$

Note that the equation 9 gives the normalization constant directly  $\varphi(\|h(y_i, f_i)\|_2^2)$  directly. QED.

### A.2 Computation of the moments and cumulants for the augmentation variable

Given the general class of distribution  $\pi_\varphi(\omega | c)$  described in Section 3.1, moments and cumulants can be easily computed: The  $k$ -th moment of a distribution can be computed by taking the  $k$ -th derivative of the moment generating function (equivalent to a negative Laplace transform) at  $t = 0$ . For example for the first moment:

$$\begin{aligned} \mathbb{E}_{\pi_\varphi(\omega | c)}[\omega] &= \left. \frac{d\mathcal{L}\{\pi_\varphi(\omega | c)\}}{dt}(-t) \right|_{t=0} \\ &= \left. \frac{d}{dt} \left[ \mathcal{L} \left[ \frac{e^{-c^2\omega} \pi_\varphi(\omega | 0)}{\varphi(c^2)} \right](-t) \right] \right|_{t=0} \\ &= -\frac{1}{\varphi(c^2)} \left. \frac{d}{dt} [\mathcal{L}[\pi_\varphi(\omega | b, 0)](t + c^2)] \right|_{t=0} \\ &= -\frac{1}{\varphi(c^2)} \left. \frac{d\varphi(t + c^2)}{dt} \right|_{t=0} \\ &= -\left. \frac{d \log \varphi(t)}{dt} \right|_{t=c^2} \\ &= -\frac{\varphi'(c^2)}{\varphi(c^2)} = \bar{\omega} \end{aligned}$$

More generally the  $k$ -th moment  $m_k$  is defined as :

$$m_k = (-1)^k \frac{1}{\varphi(c^2)} \left. \frac{d^k \varphi(t)}{dt^k} \right|_{t=c^2}$$

And the cumulants  $\kappa_k$  are computed using the cumulant generating function (log of the moment generating function)

$$\kappa_k = (-1)^k \left. \frac{d^k \log \varphi(t)}{dt^k} \right|_{t=c^2}$$

### A.3 Algorithm for the sparse case

---

#### Algorithm 3 Augmented Stochastic Variational Inference

---

**Input:** Data  $(\mathbf{X}, \mathbf{y})$ , GP model  $p(\mathbf{y}|\mathbf{f}, \mathbf{u})$ , kernel  $k$   
**Output:** Approximate posterior  $q(\mathbf{u}) = \mathcal{N}(\mathbf{u}|\mathbf{m}, \mathbf{S})$   
 Find inducing points inputs  $Z$  via  $k$ -means  
 Compute kernel matrices :  $K_Z, \kappa = K_{XZ}K_Z^{-1}$   
**for** iteration  $t = 1, 2, \dots$ , **do**  
   # Local updates:  
   Sample minibatch  $\mathcal{B} \subseteq \{1, \dots, n\}$   
   **for**  $i \in \mathcal{B}$  **do**  
      $c_i = \sqrt{\mathbb{E}_{q(f)} [h(f_i, y_i)^2]}$   
      $\bar{\omega}_i = \mathbb{E}_{q(\omega_i)} [\omega_i] = -\varphi'(c_i^2)/\varphi(c_i^2)$   
   **end for**  
   # Natural gradient updates (CAVI):  
    $\tilde{\mathbf{S}} = (\kappa^\top \text{diag}(2\bar{\omega} \circ \gamma(\mathbf{y})) \kappa + K_Z^{-1})^{-1}$   
    $\tilde{\mathbf{m}} = \tilde{\mathbf{S}} (K_Z^{-1} \mu_0 + \kappa^\top (g(\mathbf{y}) + \bar{\omega} \circ \beta(\mathbf{y})))$   
    $\{\mathbf{m}, \mathbf{S}\} \leftarrow (1 - \rho^{(t)})\{\mathbf{m}, \mathbf{S}\} + \rho^{(t)}\{\tilde{\mathbf{m}}, \tilde{\mathbf{S}}\}$   
**end for**

---

$\rho^{(t)}$  is an arbitrary learning rate respecting the Robbins-Monroe condition.

### A.4 ELBO Analysis

#### A.4.1 Full ELBO

$$\begin{aligned} \text{ELBO} &= \sum_{i=1}^N \mathbb{E}_{q(f_i, \omega_i)} [\log p(y_i | f_i, \omega_i)] \\ &\quad - \text{KL}[q(f) || p(f)] - \sum_{i=1}^N \text{KL}[q(\omega_i) || p(\omega_i)] \end{aligned}$$

$$\begin{aligned} \mathbb{E}_q [\log p(y_i | f_i, \omega_i, \theta)] &= \log C(\theta) + g(y_i, \theta) \mathbb{E}_{q(f)} [f] - \mathbb{E}_{q(f)} [h(f_i, y_i)^2] \mathbb{E}_{q(\omega_i)} [\omega_i] \\ &= \log C(\theta) + g(y_i, \theta) m_i - (\alpha(y_i) - \beta(y_i) m_i + \gamma(y_i) (m_i^2 + S_{ii})) \bar{\omega}_i \\ \text{KL}[q(f) || p(f)] &= \frac{1}{2} \left[ \log \frac{|K|}{|\mathbf{S}|} - N + \text{tr}(K^{-1} \mathbf{S}) + (\boldsymbol{\mu}_0 - \mathbf{m})^\top K^{-1} (\boldsymbol{\mu}_0 - \mathbf{m}) \right] \\ \text{KL}[q(\omega_i) || p(\omega_i)] &= -\mathbb{E}_{q(\omega_i)} [c_i^2 \omega_i] - \log \varphi(c_i^2) = -c_i^2 \bar{\omega}_i - \log \varphi(c_i^2) \end{aligned}$$

Note that we can take the derivatives of the ELBO and set them to 0 to recover exactly the updates in algorithm 1.

#### A.4.2 Analysis of the optima

By setting  $c_i^2$  as a function of  $\mathbf{m}$  and  $\mathbf{S}$  (and setting  $\mu_0$  to 0 for simplicity) we can get an ELBO only depending of the variational parameters of  $f$ .

$$\text{ELBO}(\mathbf{m}, \mathbf{S}) = C + g^\top \mathbf{m} + \frac{1}{2} \left( \underbrace{\log |\mathbf{S}| - \text{tr}(K^{-1} \mathbf{S}) - \mathbf{m}^\top K^{-1} \mathbf{m}}_{\text{ELBO}_1} \right) + \sum_i \underbrace{\log \varphi(m_i^2 + S_{ii})}_{\text{ELBO}_2}$$

It is easy to show that  $\text{ELBO}_1$  is jointly concave in  $\mathbf{m}$  and  $\mathbf{S}$  with a short matrix analysis. However  $\text{ELBO}_2$  is more complex :  $m_i^2 + S_{ii}$  is jointly convex in  $\mathbf{m}$  and  $\mathbf{S}$ ,  $\phi(r)$  is by definition convex as well, however  $\phi(m_i^2 + S_{ii})$  is neither jointly convex or concave in  $\mathbf{m}$  and  $\mathbf{S}$ . It is therefore impossible to guarantee that there is a global optima, however the CAVI updates guarantee us a local optima.

#### A.4.3 ELBO Gap

For a fixed  $q(f)$  we can compare the ELBO of the original model  $\mathcal{L}_{std}(q(f))$  and the augmented model  $\mathcal{L}_{aug}(q(f)q(\omega))$ . It is then straightforward to compute the difference between the two :

$$\begin{aligned} \Delta \mathcal{L} &= \mathcal{L}_{std}(q(f)) - \mathcal{L}_{aug}(q(f)q(\omega)) \\ &= \mathbb{E}_{q(f)} [\log p(y, f) - \log q(f) - \mathbb{E}_{q(\omega)} [p(y, f, \omega) - \log q(f)q(\omega)]] \\ &= \mathbb{E}_{q(f)q(\omega)} \left[ -\log \frac{p(y, f, \omega)}{p(y, f)} + \log q(\omega) \right] \\ &= \mathbb{E}_{q(f)q(\omega)} [-\log p(\omega|y, f) + \log q(\omega)] \\ &= \mathbb{E}_{q(\omega)} [\log q(\omega) - \mathbb{E}_{q(f)} [\log p(\omega|y, f)]] \\ &= -c^2 \mathbb{E}_{q(\omega)} [\omega] + \mathbb{E}_{q(\omega)} [\log \text{PG}(\omega|1, 0)] - \log \varphi(c^2) \\ &\quad + \mathbb{E}_{q(f)} [f^2] \mathbb{E}_{q(\omega)} [\omega] - \mathbb{E}_{q(\omega)} [\log \text{PG}(\omega|1, 0)] + \mathbb{E}_{q(f)} [\log \varphi(f^2)] \\ &= -c^2 m - \log \varphi(c^2) + \mathbb{E}_{q(f)} [f^2] m + \mathbb{E}_{q(f)} [\log \varphi(f^2)] \end{aligned}$$

Replacing with the optimal  $q^*(\omega) = \frac{e^{-c^2 \omega} p(\omega)}{\varphi(c^2)}$  with  $c^2 = \mathbb{E}_{q(f)} [f^2]$

$$\Delta \mathcal{L}^* = -\log \varphi(c^2) + \mathbb{E}_{q(f)} [\log \varphi(f^2)]$$

#### A.4.4 Sparse ELBO

When using the inducing points approach the ELBO becomes:

$$\begin{aligned} \text{ELBO} &= \sum_{i=1}^N \mathbb{E}_{q(f_i, u_i, \omega_i)} [\log p(y_i | f_i, u_i, \omega_i)] \\ &\quad - \text{KL}[q(u) || p(u)] - \sum_{i=1}^N \text{KL}[q(\omega_i) || p(\omega_i)] \end{aligned}$$

$$\begin{aligned}
 \mathbb{E}_q [\log p(y_i | f_i, \omega_i, \theta)] &= \log C(\theta) + g(y_i, \theta) \mathbb{E}_{q(f, u)} [f] - \mathbb{E}_{q(f, u)} [h(f_i, y_i)^2] \mathbb{E}_{q(\omega_i)} [\omega_i] \\
 &= \log C(\theta) + g(y_i, \theta) (\kappa^\top \mathbf{m})_i - (\alpha(y_i) - \beta(y_i) (\kappa^\top \mathbf{m})_i + \gamma(y_i) ((\kappa^\top \mathbf{m})_i^2 + (\kappa^\top \mathbf{S} \kappa)_{ii})) \bar{\omega}_i \\
 \text{KL}[q(f) || p(f)] &= \frac{1}{2} \left[ \log \frac{|K|}{|\mathbf{S}|} - N + \text{tr}(K^{-1} \mathbf{S}) + (\boldsymbol{\mu}_0 - \mathbf{m})^\top K^{-1} (\boldsymbol{\mu}_0 - \mathbf{m}) \right] \\
 \text{KL}[q(\omega_i) || p(\omega_i)] &= -\mathbb{E}_{q(\omega_i)} [c_i^2 \omega_i] - \log \varphi(c_i^2) = -c_i^2 \bar{\omega}_i - \log \varphi(c_i^2)
 \end{aligned}$$

## A.5 Proof of equivalence between Jaakkola bound and data augmentation

Jaakkola and Jordan (2000) proposed an approach purely based on optimization. They are assuming  $\log p(y|f)$  contains a part convex in  $f^2$ :  $\log p(y|f) = \log p_{\text{convex}}(f) + \log p_{\text{non-convex}}(f, y)$ . Using convexity properties they are creating a bound with a Taylor expansion to the first order around an additional variable  $c^2$ :

$$\log p_c(f) \geq \log p_c(c) + \frac{d \log p_c(c)}{dc^2} (f^2 - c^2)$$

Putting it back in the full ELBO, they are now getting a quadratic part in  $f$ , analytically differentiable, and they just need to optimize the additional variables  $\{c_i\}$ . Merkle (2014) shows that any completely monotone function is log-convex, i.e.  $\log \varphi(r)$  is convex. Therefore we can replace  $\log p_c(c)$  by  $\log \varphi(r)$  to recover our model in the context of variational inference. Note that the converse does not hold, therefore the complete monotonicity is a stronger assumption.

## A.6 Likelihoods used for the experiments

We detail all likelihoods used for the experiments and their formulation as in equation (4).

**Laplace Likelihood :**  $\text{Laplace}(y|f, \beta) = \frac{1}{2\beta} \exp\left(-\frac{|f-y|}{\beta}\right)$

**Logistic Likelihood :**  $p(y|f) = \sigma(yf) = \frac{e^{yf/2}}{2 \cosh(|f|/2)}$

**Student-T Likelihood :**  $p(y|f) = \frac{\Gamma((\nu+1)/2)}{\Gamma(\nu/2)\sqrt{\pi\nu}} \left(1 + \frac{(y-f)^2}{\nu}\right)^{-(\nu+1)/2}$

**Matern 3/2 Likelihood :**  $p(y|f) = \frac{4\rho}{\sqrt{3}} \left(1 + \frac{\sqrt{3}(y-f)^2}{\rho}\right) \exp\left(-\frac{\sqrt{3}(y-f)^2}{\rho}\right)$

| Likelihood | $C(\theta)$                                    | $g(y, \theta)$ | $\ h(y, f, \theta)\ _2^2$ | $\alpha(y)$ | $\beta(y)$ | $\gamma(y)$ | $\varphi(r)$                                      |
|------------|------------------------------------------------|----------------|---------------------------|-------------|------------|-------------|---------------------------------------------------|
| Laplace    | $(2\beta)^{-1}$                                | 0              | $(y-f)^2$                 | $y^2$       | $2y$       | 1           | $e^{-\sqrt{r}/\beta}$                             |
| Logistic   | $2^{-1}$                                       | $y/2$          | $f^2$                     | 0           | 0          | 1           | $\cosh^{-1}(\sqrt{r}/2)$                          |
| Student-T  | $\Gamma((\nu+1)/2)/(\Gamma(\nu)\sqrt{\pi\nu})$ | 0              | $(y-f)^2$                 | $y^2$       | $2y$       | 1           | $(1 + \frac{r}{\nu})^{-(\nu+1)/2}$                |
| Matern 3/2 | $4\rho/\sqrt{3}$                               | 0              | $(y-f)^2$                 | $y^2$       | $2y$       | 1           | $(1 + \frac{\sqrt{3}r}{\rho})e^{-\sqrt{3}r/\rho}$ |

## A.7 Extra figures

### A.7.1 Autocorrelation plots

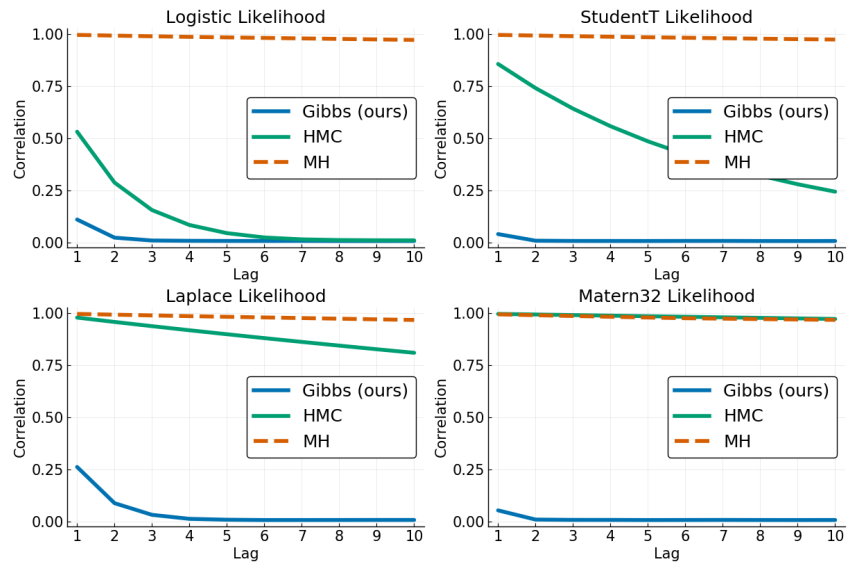

Figure 4. Auto-correlation plots for differents with lags from 1 to 10

A.7.2 HMC Results

| $\epsilon/n_{step}$ |                 | 1     | 2     | 5            | 10    |
|---------------------|-----------------|-------|-------|--------------|-------|
| 0.01                | Time/Sample (s) | 0.037 | 0.045 | 0.077        | 0.133 |
|                     | Lag 1           | 0.999 | 0.993 | 0.978        | 0.963 |
|                     | Gelman          | 3.14  | 1.02  | 1.00         | 2.05  |
| 0.05                | Time/Sample (s) | 0.036 | 0.046 | 0.080        | 0.12  |
|                     | Lag 1           | 0.999 | 0.998 | <b>0.931</b> | 0.948 |
|                     | Gelman          | 1.72  | 1.18  | 1.01         | 3.25  |
| 0.1                 | Time/Sample (s) | 0.033 | 0.042 | 0.073        | 0.13  |
|                     | Lag 1           | 0.997 | 0.996 | 0.998        | 0.994 |
|                     | Gelman          | 1.11  | 1.04  | 1.27         | 2.71  |

Table 3. HMC results for the Laplace likelihood

| $\epsilon/n_{step}$ |                 | 1     | 2     | 5     | 10           |
|---------------------|-----------------|-------|-------|-------|--------------|
| 0.01                | Time/Sample (s) | 0.675 | 0.110 | 0.177 | 0.251        |
|                     | Lag 1           | 0.999 | 0.999 | 0.997 | 0.993        |
|                     | Gelman          | 3.14  | 1.74  | 1.11  | 1.02         |
| 0.05                | Time/Sample (s) | 0.148 | 0.192 | 0.336 | 0.573        |
|                     | Lag 1           | 0.997 | 0.993 | 0.962 | <b>0.857</b> |
|                     | Gelman          | 1.10  | 1.02  | 1.00  | 1.00         |
| 0.1                 | Time/Sample (s) | 0.142 | 0.193 | 0.337 | NA           |
|                     | Lag 1           | 0.993 | 0.976 | 0.864 | NA           |
|                     | Gelman          | 1.03  | 1.01  | 1.00  | NA           |

Table 4. HMC results for the Student-T likelihood

| $\epsilon/n_{step}$ |                 | 1     | 2     | 5     | 10           |
|---------------------|-----------------|-------|-------|-------|--------------|
| 0.01                | Time/Sample (s) | 0.009 | 0.013 | 0.021 | 0.041        |
|                     | Lag 1           | 0.999 | 0.999 | 0.998 | 0.994        |
|                     | Gelman          | 3.19  | 1.68  | 1.12  | 1.02         |
| 0.05                | Time/Sample (s) | 0.011 | 0.014 | 0.025 | 0.41         |
|                     | Lag 1           | 0.998 | 0.994 | 0.968 | 0.871        |
|                     | Gelman          | 1.11  | 1.03  | 1.00  | 1.00         |
| 0.1                 | Time/Sample (s) | 0.011 | 0.014 | 0.024 | 0.048        |
|                     | Lag 1           | 0.994 | 0.979 | 0.875 | <b>0.532</b> |
|                     | Gelman          | 1.02  | 1.01  | 1.00  | 1.00         |

Table 5. HMC Results for the Logistic likelihood

A.7.3 ELBO difference

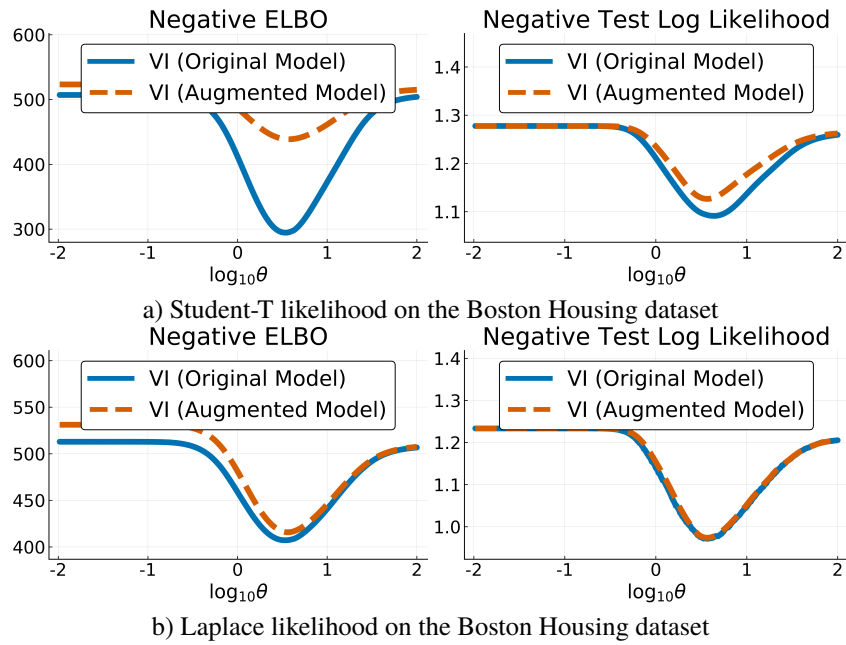

Figure 5. Converged negative ELBO and averaged negative log-likelihood on a held-out dataset in function of the RBF kernel lengthscale, training VI with and without augmentation.

A.7.4 Convergence speed

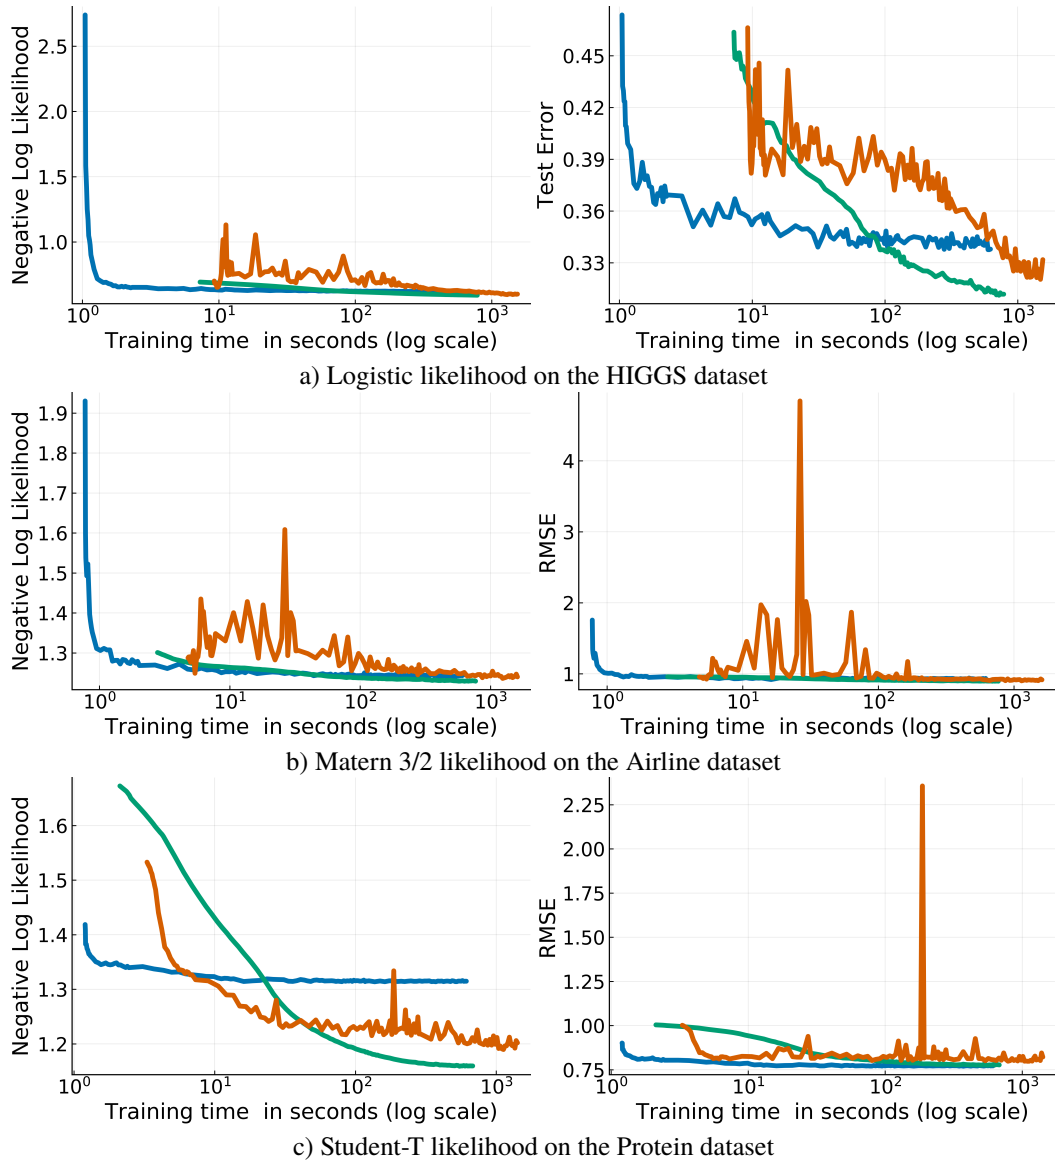

Figure 6. Supplementary convergence plots
